# Supplementary material for: The STRidER Report on Two Years of Quality Control of Autosomal STR Population Datasets
Source: PubMed Central journal article supplement (PMC7463946; doi:10.3390/genes11080901), 2020-08-07
Supplement: genes-11-00901-s001.pdf [file genes-11-00901-s001.pdf]

**The STRidER report on two years of quality control of autosomal STR population datasets**  
 Martin Bodner, Walther Parson

**Table S1: Geographic origin of the 184 autosomal STR datasets submitted to STRidER in its first two years (online map available at <https://bit.ly/3fiSSJC>)**

| continents | countries                                | datasets |      |        |      |
|------------|------------------------------------------|----------|------|--------|------|
|            |                                          | number   | [%]  | number | [%]  |
| AFRICA     | Algeria, Egypt, Libya, Morocco*          | 1        | 0.5  | 10     | 5.4  |
|            | Ghana                                    | 2        | 1.1  |        |      |
|            | Mauritius                                | 2        | 1.1  |        |      |
|            | Mozambique                               | 1        | 0.5  |        |      |
|            | Cameroon, Chad, Niger, Nigeria, Senegal* | 3        | 1.6  |        |      |
|            | Sierra Leone                             | 1        | 0.5  |        |      |
| AMERICAS   | Argentina                                | 28       | 15.2 | 45     | 24.5 |
|            | Brazil                                   | 6        | 3.3  |        |      |
|            | Mexico                                   | 2        | 1.1  |        |      |
|            | Paraguay                                 | 4        | 2.2  |        |      |
|            | USA                                      | 5        | 2.7  |        |      |
| ASIA       | China                                    | 81       | 44.0 | 113    | 61.4 |
|            | India                                    | 7        | 3.8  |        |      |
|            | Iraq                                     | 3        | 1.6  |        |      |
|            | Malaysia                                 | 4        | 2.2  |        |      |
|            | Pakistan                                 | 2        | 1.1  |        |      |
|            | Philippines                              | 2        | 1.1  |        |      |
|            | Saudi Arabia                             | 3        | 1.6  |        |      |
|            | Thailand                                 | 9        | 4.9  |        |      |
|            | Vietnam                                  | 2        | 1.1  |        |      |
| EUROPE     | Austria                                  | 1        | 0.5  | 13     | 7.1  |
|            | Italy                                    | 2        | 1.1  |        |      |
|            | Poland                                   | 1        | 0.5  |        |      |
|            | Switzerland                              | 1        | 0.5  |        |      |
|            | Slovenia                                 | 2        | 1.1  |        |      |
|            | Spain                                    | 3        | 1.6  |        |      |
|            | Sweden                                   | 1        | 0.5  |        |      |
|            | UK                                       | 1        | 0.5  |        |      |
|            | Ukraine                                  | 1        | 0.5  |        |      |
| UNKNOWN    | unspecified African origin               | 1        | 0.5  | 3      | 1.6  |
|            | unspecified Asian origin                 | 1        | 0.5  |        |      |
|            | unspecified "Caucasian" origin           | 1        | 0.5  |        |      |

\*mixed datasets
